# Supplementary material for: Bioaccumulation and Trophic Transfer of Soluble and Nanostructured Forms of a Commercial Antifouling Biocide
Source: Preprints.org preprint supplement (doi:10.20944/preprints202402.0406.v1), 2024-02-07
Supplement: Supplementary file 1 [file supplementary]

## **Bioaccumulation and trophic transfer in mussels after short term exposure to DCOIT and SiNC-DCOIT**

Bruno G. Campos, Olga Kaczerewska, Frederico Maia, Denis M. S. Abessa, Susana Loureiro, Roberto Martins

**Supplementary Material**


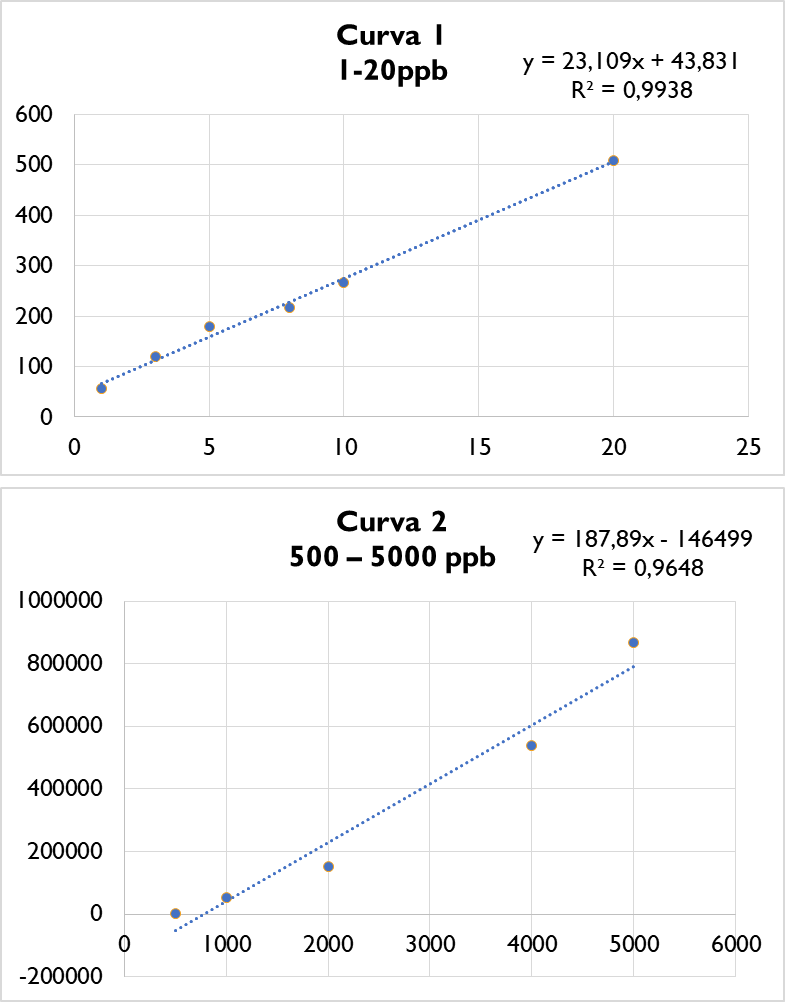


**Figure S1**. Standard curves prepared with DCOIT during the calibration of the equipment.


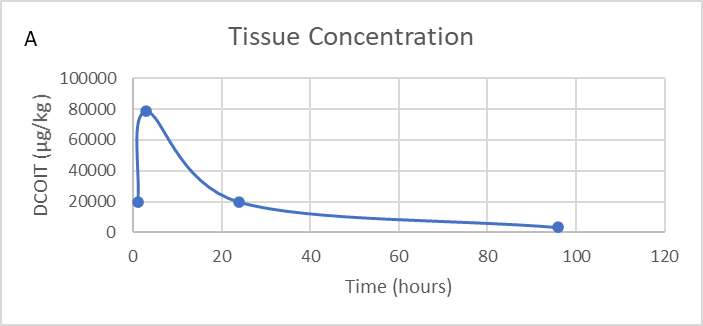


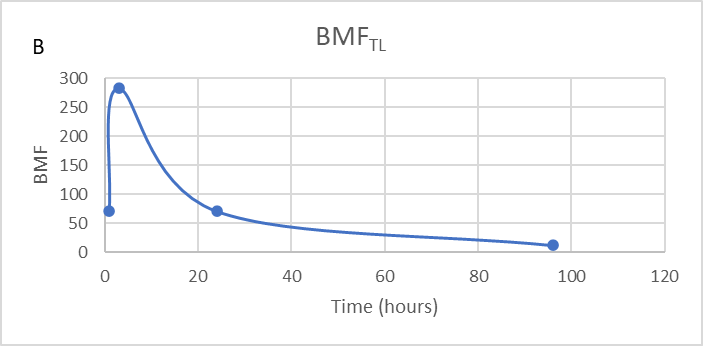


**Figure S2:** *Mytilus galloprovincialis* tissue concentration (µg/Kg) (A) and predatory biomagnification factor (BMFTL) (B) for the replicate 2 organism at the food exposure treatment.


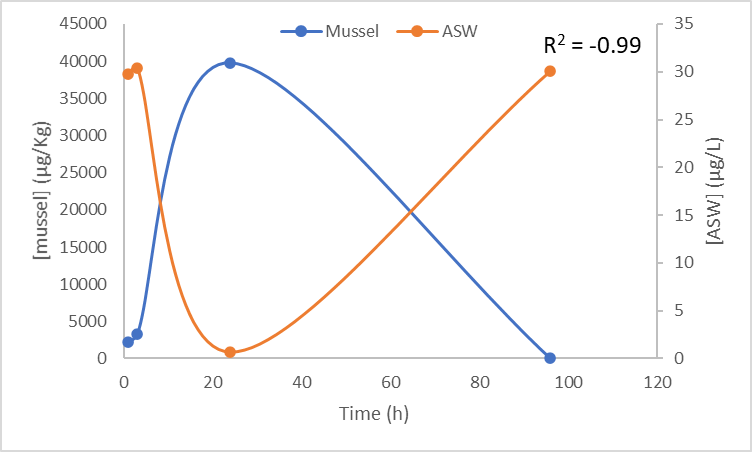


**Figure S3:** Replicate 2, *Mytilus galloprovincialis* tissue concentration (µg/Kg) and ASW concentration (µg/Kg) of DCOIT, during the water + food exposure treatment. R2 indicates the correlation between DCOIT in the media (ASW) and *M. galloprovincialis* tissue.
